# Supplementary material for: Theoretical Insight into B–C Chemical Bonding in Closo-Borate [BnHn−1CH3]2− (n = 6, 10, 12) and Monocarborane [CBnHnCH3]− (n = 5, 9, 11) Anions
Source: MDPI journal article supplement (doi:10.3390/inorganics10110186), 2022-10-28
Supplement: s1 [file s1]

Supplementary materials

Theoretical insight on B–C chemical bonding in *closo*-borate  $[\text{B}_n\text{H}_{n-1}\text{CH}_3]^{2-}$  ( $n = 6, 10, 12$ ) and monocarborane  $[\text{CB}_n\text{H}_n\text{CH}_3]^-$  ( $n = 5, 9, 11$ ) anions

Ilya N. Klyukin<sup>1</sup>, Anastasia V. Kolbunova<sup>1,2</sup>, Alexander S. Novikov<sup>3,4\*</sup>,  
Andrey P. Zhdanov<sup>1</sup>, Konstantin Yu. Zhizhin<sup>1</sup>, Nikolay T. Kuznetsov<sup>1</sup>

*1) Kurnakov Institute of General and Inorganic Chemistry,  
Russian Academy of Sciences,  
Leninskii pr. 31, 117907, Moscow, Russian Federation;*

*2) Higher School of Economics, Faculty of Chemistry,  
Myasnitskaya yl. 101000, Moscow, Russian Federation;*

*3) Saint Petersburg State University, Institute of Chemistry,  
Universitetskaya Nab. 7-9, 199034, Saint Petersburg, Russian Federation*

*4) Peoples' Friendship University of Russia (RUDN University), Research Institute of  
Chemistry, Miklukho-Maklaya st. 6, 117198, Moscow, Russian Federation*

**Table S1.**  $\Delta H$  – relative enthalpy energies of carborane isomers, kJ/mol,  $\Delta G$  – relative Gibbs energy of carborane isomers, kJ/mol.

| Model species                                                                   | $\Delta H$ | $\Delta G$ |
|---------------------------------------------------------------------------------|------------|------------|
| [ <i>ortho</i> -CB <sub>5</sub> H <sub>5</sub> CH <sub>3</sub> ] <sup>−</sup>   | 0.0        | 0.0        |
| [ <i>meta</i> -CB <sub>5</sub> H <sub>5</sub> CH <sub>3</sub> ] <sup>−</sup>    | 0.9        | 1.4        |
| [ <i>ortho</i> -CB <sub>9</sub> H <sub>9</sub> CH <sub>3</sub> ] <sup>−</sup>   | 0.0        | 0.0        |
| [ <i>meta</i> -CB <sub>9</sub> H <sub>9</sub> CH <sub>3</sub> ] <sup>−</sup>    | 3.1        | 2.5        |
| [ <i>para</i> -CB <sub>9</sub> H <sub>9</sub> CH <sub>3</sub> ] <sup>−</sup>    | 2.2        | 1.5        |
| [ <i>ortho</i> -CB <sub>11</sub> H <sub>11</sub> CH <sub>3</sub> ] <sup>−</sup> | 0.0        | 0.0        |
| [ <i>meta</i> -CB <sub>11</sub> H <sub>11</sub> CH <sub>3</sub> ] <sup>−</sup>  | 8.0        | 6.6        |
| [ <i>para</i> -CB <sub>11</sub> H <sub>11</sub> CH <sub>3</sub> ] <sup>−</sup>  | 3.3        | 1.8        |

**Table S2.** B–C bond lengths and bond order descriptors. LBO - Laplacian bond order. FBO - fuzzy bond order, Mayer indices, Wiberg indices.

| Model species                                                                   | B–C<br>length (Å) | LBO   | FBO   | Mayer<br>Index | Wiberg<br>Index |
|---------------------------------------------------------------------------------|-------------------|-------|-------|----------------|-----------------|
| (CH <sub>3</sub> )BH <sub>2</sub>                                               | 1.56              | 1.251 | 1.195 | 1.014          | 0.95            |
| (CH <sub>3</sub> ) <sub>2</sub> BH                                              | 1.57              | 1.215 | 1.150 | 0.997          | 0.94            |
| (CH <sub>3</sub> ) <sub>3</sub> B                                               | 1.58              | 1.170 | 1.099 | 0.998          | 0.92            |
| [B <sub>6</sub> H <sub>5</sub> CH <sub>3</sub> ] <sup>2−</sup>                  | 1.63              | 0.887 | 1.050 | 0.473          | 0.90            |
| [1-B <sub>10</sub> H <sub>9</sub> CH <sub>3</sub> ] <sup>2−</sup>               | 1.61              | 0.923 | 1.050 | 0.381          | 0.91            |
| [2-B <sub>10</sub> H <sub>9</sub> CH <sub>3</sub> ] <sup>2−</sup>               | 1.62              | 0.905 | 1.023 | 0.113          | 0.98            |
| [B <sub>12</sub> H <sub>11</sub> CH <sub>3</sub> ] <sup>2−</sup>                | 1.62              | 0.920 | 1.020 | 0.132          | 0.92            |
| [ <i>ortho</i> -CB <sub>5</sub> H <sub>5</sub> CH <sub>3</sub> ] <sup>−</sup>   | 1.60              | 0.992 | 1.079 | 0.746          | 0.93            |
| [ <i>meta</i> -CB <sub>5</sub> H <sub>5</sub> CH <sub>3</sub> ] <sup>−</sup>    | 1.60              | 0.987 | 1.078 | 0.899          | 0.93            |
| [ <i>ortho</i> -CB <sub>9</sub> H <sub>9</sub> CH <sub>3</sub> ] <sup>−</sup>   | 1.60              | 1.010 | 1.053 | 0.757          | 0.93            |
| [ <i>meta</i> -CB <sub>9</sub> H <sub>9</sub> CH <sub>3</sub> ] <sup>−</sup>    | 1.61              | 0.953 | 1.041 | 0.632          | 0.93            |
| [ <i>para</i> -CB <sub>9</sub> H <sub>9</sub> CH <sub>3</sub> ] <sup>−</sup>    | 1.60              | 0.995 | 1.070 | 0.827          | 0.93            |
| [ <i>ortho</i> -CB <sub>11</sub> H <sub>11</sub> CH <sub>3</sub> ] <sup>−</sup> | 1.60              | 0.999 | 1.044 | 0.763          | 0.94            |
| [ <i>meta</i> -CB <sub>11</sub> H <sub>11</sub> CH <sub>3</sub> ] <sup>−</sup>  | 1.61              | 0.969 | 1.039 | 0.869          | 0.94            |
| [ <i>para</i> -CB <sub>11</sub> H <sub>11</sub> CH <sub>3</sub> ] <sup>−</sup>  | 1.61              | 0.972 | 1.038 | 0.902          | 0.94            |

**Table S3.** Main topological parameters of electron density for B–C interactions.  $\rho(r)$  – electron density at the bcp,  $\nabla^2\rho(r)$  – Laplacian of electron density at the bcp,  $G(r)$  – Lagrangian kinetic energy,  $V(r)$  – potential energy,  $H_b$  – total energy at the bcp,  $\delta(B-C)$  – delocalization index,  $\varepsilon_b$  – ellipticity at the bcp,  $\bar{N}$  – electron population in basins ELF.

| Model species                                                                   | $\rho(r)$<br>( $e \text{ \AA}^{-3}$ ) | $\nabla^2\rho(r)$<br>( $e \text{ \AA}^{-5}$ ) | $G(r)$<br>( $h \text{ e}^{-1}$ ) | $V(r)$<br>( $h \text{ e}^{-1}$ ) | $H_b$<br>( $h \text{ e}^{-1}$ ) | $\varepsilon$ | $\delta(B-C)$ | $\bar{N}(e)$ |
|---------------------------------------------------------------------------------|---------------------------------------|-----------------------------------------------|----------------------------------|----------------------------------|---------------------------------|---------------|---------------|--------------|
| (CH <sub>3</sub> )BH <sub>2</sub>                                               | 0.186                                 | -0.154                                        | 0.153                            | -0.344                           | -0.191                          | 0.293         | 0.525         | 2.03         |
| (CH <sub>3</sub> ) <sub>2</sub> BH                                              | 0.183                                 | -0.138                                        | 0.152                            | -0.339                           | -0.187                          | 0.283         | 0.497         | 2.04         |
| (CH <sub>3</sub> ) <sub>3</sub> B                                               | 0.180                                 | -0.136                                        | 0.149                            | -0.332                           | -0.183                          | 0.284         | 0.474         | 2.04         |
| [B <sub>6</sub> H <sub>5</sub> CH <sub>3</sub> ] <sup>2-</sup>                  | 0.149                                 | 0.039                                         | 0.143                            | -0.276                           | -0.133                          | 0.002         | 0.637         | 1.96         |
| [1-B <sub>10</sub> H <sub>9</sub> CH <sub>3</sub> ] <sup>2-</sup>               | 0.156                                 | 0.020                                         | 0.147                            | -0.290                           | -0.142                          | 0.001         | 0.647         | 1.97         |
| [2-B <sub>10</sub> H <sub>9</sub> CH <sub>3</sub> ] <sup>2-</sup>               | 0.156                                 | -0.017                                        | 0.141                            | -0.285                           | -0.145                          | 0.135         | 0.629         | 1.94         |
| [B <sub>12</sub> H <sub>11</sub> CH <sub>3</sub> ] <sup>2-</sup>                | 0.158                                 | -0.035                                        | 0.140                            | -0.288                           | -0.148                          | 0.002         | 0.628         | 1.95         |
| [ <i>ortho</i> -CB <sub>5</sub> H <sub>5</sub> CH <sub>3</sub> ] <sup>-</sup>   | 0.164                                 | -0.045                                        | 0.144                            | -0.299                           | -0.155                          | 0.037         | 0.621         | 2.01         |
| [ <i>meta</i> -CB <sub>5</sub> H <sub>5</sub> CH <sub>3</sub> ] <sup>-</sup>    | 0.163                                 | -0.053                                        | 0.141                            | -0.295                           | -0.154                          | 0.001         | 0.648         | 2.00         |
| [ <i>ortho</i> -CB <sub>9</sub> H <sub>9</sub> CH <sub>3</sub> ] <sup>-</sup>   | 0.170                                 | -0.104                                        | 0.143                            | -0.303                           | -0.166                          | 0.001         | 0.594         | 2.00         |
| [ <i>meta</i> -CB <sub>9</sub> H <sub>9</sub> CH <sub>3</sub> ] <sup>-</sup>    | 0.164                                 | -0.085                                        | 0.137                            | -0.295                           | -0.158                          | 0.119         | 0.650         | 1.96         |
| [ <i>para</i> -CB <sub>9</sub> H <sub>9</sub> CH <sub>3</sub> ] <sup>-</sup>    | 0.167                                 | -0.063                                        | 0.140                            | -0.306                           | -0.159                          | 0.071         | 0.659         | 2.00         |
| [ <i>ortho</i> -CB <sub>11</sub> H <sub>11</sub> CH <sub>3</sub> ] <sup>-</sup> | 0.170                                 | -0.122                                        | 0.137                            | -0.304                           | -0.167                          | 0.052         | 0.621         | 1.99         |
| [ <i>meta</i> -CB <sub>11</sub> H <sub>11</sub> CH <sub>3</sub> ] <sup>-</sup>  | 0.166                                 | -0.102                                        | 0.136                            | -0.298                           | -0.162                          | 0.002         | 0.647         | 1.97         |
| [ <i>para</i> -CB <sub>11</sub> H <sub>11</sub> CH <sub>3</sub> ] <sup>-</sup>  | 0.166                                 | -0.102                                        | 0.137                            | -0.298                           | -0.162                          | 0.002         | 0.645         | 1.97         |

**Table S4.** Main parameters of molecular orbitals for B–C interactions obtained with the help of NBO formalism.

| Model species                                                     | Energy of<br>B–C orbital | Coefficient of<br>B atom | Coefficient of<br>C atom |
|-------------------------------------------------------------------|--------------------------|--------------------------|--------------------------|
| (CH <sub>3</sub> )BH <sub>2</sub>                                 | -0.91                    | 0.57                     | 0.82                     |
| (CH <sub>3</sub> ) <sub>2</sub> BH                                | -0.90                    | 0.57                     | 0.82                     |
| (CH <sub>3</sub> ) <sub>3</sub> B                                 | -0.90                    | 0.56                     | 0.83                     |
| [B <sub>6</sub> H <sub>5</sub> CH <sub>3</sub> ] <sup>2-</sup>    | -0.55                    | 0.59                     | 0.81                     |
| [1-B <sub>10</sub> H <sub>9</sub> CH <sub>3</sub> ] <sup>2-</sup> | -0.59                    | 0.60                     | 0.80                     |

|                                                             |       |      |      |
|-------------------------------------------------------------|-------|------|------|
| $[2\text{-B}_{10}\text{H}_9\text{CH}_3]^{2-}$               | -0.59 | 0.60 | 0.80 |
| $[\text{B}_{12}\text{H}_{11}\text{CH}_3]^{2-}$              | -0.60 | 0.61 | 0.79 |
| $[\textit{ortho}\text{-CB}_5\text{H}_5\text{CH}_3]^-$       | -0.73 | 0.60 | 0.80 |
| $[\textit{meta}\text{-CB}_5\text{H}_5\text{CH}_3]^-$        | -0.72 | 0.60 | 0.80 |
| $[\textit{ortho}\text{-CB}_9\text{H}_9\text{CH}_3]^-$       | -0.76 | 0.61 | 0.79 |
| $[\textit{meta}\text{-CB}_9\text{H}_9\text{CH}_3]^-$        | -0.73 | 0.62 | 0.79 |
| $[\textit{para}\text{-CB}_9\text{H}_9\text{CH}_3]^-$        | -0.74 | 0.61 | 0.79 |
| $[\textit{ortho}\text{-CB}_{11}\text{H}_{11}\text{CH}_3]^-$ | -0.77 | 0.62 | 0.79 |
| $[\textit{meta}\text{-CB}_{11}\text{H}_{11}\text{CH}_3]^-$  | -0.74 | 0.62 | 0.78 |
| $[\textit{para}\text{-CB}_{11}\text{H}_{11}\text{CH}_3]^-$  | -0.74 | 0.62 | 0.79 |

**Table S5.** Second order perturbation theory analysis of Fock matrix in NBO basis of *exo*-polyhedral B–C back bonding interactions. BD – bonding orbital of C–H bond, LV – boron lone valence orbital.

| Model species                            | Donor         | Acceptor | E(2) |
|------------------------------------------|---------------|----------|------|
| $\text{BH}_2\text{CH}_3$                 |               |          |      |
|                                          | BD C2 - H3    | LV B1    | 5.91 |
|                                          | BD C2-H4      | LV B1    | 3.43 |
| $\text{BH}(\text{CH}_3)_2$               |               |          |      |
|                                          | BD C2 - H3    | LV B1    | 7.23 |
|                                          | BD C2 - H5    | LV B1    | 1.94 |
|                                          | BD C7 - H8    | LV B1    | 1.73 |
|                                          | BD C7 - H10   | LV B1    | 7.51 |
| $\text{B}(\text{CH}_3)_3$                |               |          |      |
|                                          | BD C2 - H3    | LV B1    | 6.79 |
|                                          | BD C2- H4     | LV B1    | 1.94 |
|                                          | BD C6 - H7    | LV B1    | 2.67 |
|                                          | BD C6 - H9    | LV B1    | 5.96 |
|                                          | BD C10 - H 11 | LV B1    | 5.74 |
|                                          | BD C10 - H12  | LV B1    | 2.85 |
| $[\text{B}_6\text{H}_5\text{CH}_3]^{2-}$ |               |          |      |
|                                          | BD C12 - H14  | LV B1    | 0.15 |

|                                                                |               |         |      |
|----------------------------------------------------------------|---------------|---------|------|
|                                                                | BD C12 - H13  | LV B1   | 0.15 |
|                                                                | BD C12 - H15  | LV B7   | 0.12 |
|                                                                | BD C12 - H14  | LV B8   | 0.15 |
|                                                                | BD C12 - H13  | LV B8   | 0.08 |
| $[1\text{-B}_{10}\text{H}_9\text{CH}_3]^{2-}$                  |               |         |      |
|                                                                | BD C20 - H21  | LV B5   | 0.07 |
|                                                                | BD C20 - H23  | LV B5   | 0.07 |
|                                                                | BD C20 - H22  | LV B3   | 0.06 |
|                                                                | BD B1 - C20   | LV B4   | 0.07 |
|                                                                | BD C20 - H23  | LV B4   | 0.13 |
| $[2\text{-B}_{10}\text{H}_9\text{CH}_3]^{2-}$                  |               |         |      |
|                                                                | BD C20 - H21  | LV B1   | 0.06 |
|                                                                | BD C20 - H23  | LV B1   | 0.05 |
|                                                                | BD C20 - H22  | LV B3   | 0.08 |
|                                                                | BD B1 - C20   | LV B5   | 0.07 |
|                                                                | BD C20 - H23  | LV B5   | 0.08 |
| $[\text{B}_{12}\text{H}_{11}\text{CH}_3]^{2-}$                 |               |         |      |
|                                                                | BD C24 - H27  | LV B3   | 0.08 |
|                                                                | BD C24 - H26  | LV B6   | 0.05 |
|                                                                | BD C24 - H27  | LV B14  | 0.06 |
|                                                                | BD C24 - H25  | LV B15  | 0.05 |
|                                                                | BD C24 - H27  | LV B18  | 0.07 |
| $[\textit{ortho}\text{-CB}_{11}\text{H}_{11}\text{CH}_3]^{1-}$ |               |         |      |
|                                                                | BD C24 - H25  | LV B16  | 0.86 |
|                                                                | BD C 24- H 26 | LV B 16 | 0.69 |
|                                                                | BD C24 - H 27 | LV B 16 | 2.08 |

**Table S6.** NBO, QTAIM and Hirshfeld atomic charges of derivatives of *closo*-borate anions  $[\text{B}_n\text{H}_{n-1}\text{CH}_3]^{2-}$  ( $n = 6, 10, 12$ ), monocarboranes  $[\text{CB}_n\text{H}_{n-1}\text{CH}_3]^-$  ( $n = 5, 9, 11$ ) and  $\text{BH}_{3-n}(\text{CH}_3)_n$   $n=1-3$ .

| Model species                                 | Atom | Hirshfeld | NBO   | QTAIM |
|-----------------------------------------------|------|-----------|-------|-------|
| $[\text{B}_6\text{H}_5\text{CH}_3]^{2-}$      |      |           |       |       |
|                                               | 1B   | -0.18     | -0.28 | 0.38  |
|                                               | 2B   | -0.18     | -0.29 | 0.40  |
|                                               | 3B   | -0.19     | -0.30 | 0.40  |
|                                               | 4H   | -0.15     | -0.04 | -0.73 |
|                                               | 5H   | -0.15     | -0.04 | -0.73 |
|                                               | 6H   | -0.15     | -0.04 | -0.73 |
|                                               | 7B   | -0.18     | -0.29 | 0.38  |
|                                               | 8B   | -0.18     | -0.28 | 0.39  |
|                                               | 9B   | -0.10     | -0.05 | 0.49  |
|                                               | 10H  | -0.15     | -0.04 | -0.73 |
|                                               | 11H  | -0.15     | -0.04 | -0.73 |
|                                               | 12C  | -0.18     | -0.92 | -0.51 |
|                                               | 13H  | -0.02     | 0.20  | -0.09 |
|                                               | 14H  | -0.02     | 0.20  | -0.09 |
|                                               | 15H  | -0.02     | 0.20  | -0.09 |
| $[1\text{-B}_{10}\text{H}_9\text{CH}_3]^{2-}$ |      |           |       |       |
|                                               | 1B   | -0.07     | -0.04 | 0.44  |
|                                               | 2B   | -0.08     | -0.19 | 0.50  |
|                                               | 3B   | -0.08     | -0.19 | 0.49  |
|                                               | 4B   | -0.08     | -0.19 | 0.49  |
|                                               | 5B   | -0.08     | -0.19 | 0.49  |
|                                               | 6H   | -0.11     | 0.01  | -0.67 |
|                                               | 7H   | -0.11     | 0.01  | -0.67 |
|                                               | 8H   | -0.11     | 0.01  | -0.67 |
|                                               | 9B   | -0.08     | -0.19 | 0.52  |
|                                               | 10B  | -0.14     | -0.27 | 0.32  |
|                                               | 11B  | -0.08     | -0.19 | 0.51  |
|                                               | 12B  | -0.08     | -0.19 | 0.52  |
|                                               | 13B  | -0.08     | -0.19 | 0.52  |

|                                                                   |     |       |       |       |
|-------------------------------------------------------------------|-----|-------|-------|-------|
|                                                                   | 14H | -0.11 | 0.01  | -0.67 |
|                                                                   | 15H | -0.11 | 0.01  | -0.67 |
|                                                                   | 16H | -0.11 | 0.01  | -0.67 |
|                                                                   | 17H | -0.11 | 0.00  | -0.68 |
|                                                                   | 18H | -0.11 | 0.01  | -0.67 |
|                                                                   | 19H | -0.11 | 0.01  | -0.67 |
|                                                                   | 20C | -0.17 | -0.90 | -0.51 |
|                                                                   | 21H | -0.01 | 0.21  | -0.08 |
|                                                                   | 22H | -0.01 | 0.21  | -0.08 |
|                                                                   | 23H | -0.01 | 0.21  | -0.08 |
| [2-B <sub>10</sub> H <sub>9</sub> CH <sub>3</sub> ] <sup>2-</sup> |     |       |       |       |
|                                                                   | 1B  | -0.14 | -0.26 | 0.31  |
|                                                                   | 2B  | -0.02 | 0.03  | 0.60  |
|                                                                   | 3B  | -0.08 | -0.19 | 0.50  |
|                                                                   | 4B  | -0.08 | -0.19 | 0.51  |
|                                                                   | 5B  | -0.08 | -0.19 | 0.52  |
|                                                                   | 6H  | -0.11 | 0.00  | -0.68 |
|                                                                   | 7H  | -0.11 | 0.02  | -0.67 |
|                                                                   | 8H  | -0.11 | 0.01  | -0.67 |
|                                                                   | 9H  | -0.11 | 0.02  | -0.67 |
|                                                                   | 10B | -0.08 | -0.20 | 0.49  |
|                                                                   | 11B | -0.13 | -0.25 | 0.34  |
|                                                                   | 12B | -0.08 | -0.20 | 0.49  |
|                                                                   | 13B | -0.08 | -0.20 | 0.51  |
|                                                                   | 14B | -0.08 | -0.20 | 0.51  |
|                                                                   | 15H | -0.11 | 0.02  | -0.67 |
|                                                                   | 16H | -0.11 | 0.01  | -0.67 |
|                                                                   | 17H | -0.11 | 0.01  | -0.67 |
|                                                                   | 18H | -0.11 | 0.00  | -0.68 |
|                                                                   | 19H | -0.11 | 0.02  | -0.67 |
|                                                                   | 20C | -0.17 | -0.91 | -0.51 |
|                                                                   | 21H | -0.01 | 0.21  | -0.07 |
|                                                                   | 22H | -0.01 | 0.21  | -0.08 |
|                                                                   | 23H | -0.01 | 0.22  | -0.07 |
| [B <sub>12</sub> H <sub>11</sub> CH <sub>3</sub> ] <sup>2-</sup>  |     |       |       |       |

|                                                                  |     |       |       |       |
|------------------------------------------------------------------|-----|-------|-------|-------|
|                                                                  | 1B  | -0.07 | -0.19 | 0.50  |
|                                                                  | 2B  | -0.07 | -0.19 | 0.50  |
|                                                                  | 3B  | -0.07 | -0.19 | 0.48  |
|                                                                  | 4B  | -0.07 | -0.19 | 0.51  |
|                                                                  | 5B  | -0.07 | -0.20 | 0.49  |
|                                                                  | 6B  | -0.07 | -0.19 | 0.48  |
|                                                                  | 7H  | -0.10 | 0.03  | -0.66 |
|                                                                  | 8H  | -0.10 | 0.03  | -0.66 |
|                                                                  | 9H  | -0.10 | 0.03  | -0.66 |
|                                                                  | 10H | -0.10 | 0.03  | -0.67 |
|                                                                  | 11H | -0.10 | 0.03  | -0.66 |
|                                                                  | 12H | -0.10 | 0.03  | -0.66 |
|                                                                  | 13B | -0.07 | -0.19 | 0.50  |
|                                                                  | 14B | -0.07 | -0.19 | 0.49  |
|                                                                  | 15B | -0.07 | -0.19 | 0.49  |
|                                                                  | 16B | -0.01 | 0.03  | 0.59  |
|                                                                  | 17B | -0.07 | -0.19 | 0.50  |
|                                                                  | 18B | -0.07 | -0.19 | 0.49  |
|                                                                  | 19H | -0.10 | 0.03  | -0.67 |
|                                                                  | 20H | -0.10 | 0.03  | -0.66 |
|                                                                  | 21H | -0.10 | 0.03  | -0.66 |
|                                                                  | 22H | -0.10 | 0.03  | -0.67 |
|                                                                  | 23H | -0.10 | 0.03  | -0.66 |
|                                                                  | 24C | -0.16 | -0.90 | -0.51 |
|                                                                  | 25H | 0.00  | 0.22  | -0.07 |
|                                                                  | 26H | 0.00  | 0.22  | -0.07 |
|                                                                  | 27H | 0.00  | 0.22  | -0.07 |
| [ <i>ortho</i> -CB <sub>5</sub> H <sub>5</sub> CH <sub>3</sub> ] |     |       |       |       |
|                                                                  | 1B  | -0.09 | -0.08 | 0.92  |
|                                                                  | 2B  | -0.09 | -0.07 | 0.90  |
|                                                                  | 3C  | -0.12 | -0.74 | -1.89 |
|                                                                  | 4H  | -0.09 | 0.00  | -0.68 |
|                                                                  | 5H  | -0.09 | -0.01 | -0.68 |
|                                                                  | 6H  | 0.03  | 0.27  | -0.02 |
|                                                                  | 7B  | -0.02 | 0.17  | 1.02  |



|                                                                               |     |       |       |       |
|-------------------------------------------------------------------------------|-----|-------|-------|-------|
|                                                                               | 8B  | -0.09 | -0.07 | 0.90  |
|                                                                               | 9B  | -0.11 | -0.19 | 0.60  |
|                                                                               | 10H | -0.09 | 0.00  | -0.67 |
|                                                                               | 11H | -0.10 | 0.00  | -0.68 |
|                                                                               | 12C | -0.17 | -0.94 | -0.57 |
|                                                                               | 13H | 0.01  | 0.23  | -0.05 |
|                                                                               | 14H | 0.01  | 0.23  | -0.05 |
|                                                                               | 15H | 0.01  | 0.22  | -0.06 |
| [ <i>meta</i> -CB <sub>5</sub> H <sub>5</sub> CH <sub>3</sub> ] <sup>−</sup>  |     |       |       |       |
|                                                                               | 1B  | -0.09 | -0.07 | 0.90  |
|                                                                               | 2B  | -0.09 | -0.08 | 0.90  |
|                                                                               | 3C  | -0.12 | -0.74 | -1.90 |
|                                                                               | 4H  | -0.09 | 0.00  | -0.67 |
|                                                                               | 5H  | -0.09 | 0.00  | -0.68 |
|                                                                               | 6H  | 0.03  | 0.27  | -0.02 |
|                                                                               | 7B  | -0.09 | -0.08 | 0.90  |
|                                                                               | 8B  | -0.09 | -0.07 | 0.91  |
|                                                                               | 9B  | -0.04 | 0.05  | 0.72  |
|                                                                               | 10H | -0.09 | 0.00  | -0.67 |
|                                                                               | 11H | -0.09 | 0.00  | -0.67 |
|                                                                               | 12C | -0.17 | -0.94 | -0.57 |
|                                                                               | 13H | 0.01  | 0.23  | -0.05 |
|                                                                               | 14H | 0.01  | 0.23  | -0.05 |
|                                                                               | 15H | 0.01  | 0.22  | -0.06 |
| [ <i>ortho</i> -CB <sub>9</sub> H <sub>9</sub> CH <sub>3</sub> ] <sup>−</sup> |     |       |       |       |
|                                                                               | 1B  | -0.08 | -0.16 | 0.46  |
|                                                                               | 2B  | -0.05 | -0.21 | 0.53  |
|                                                                               | 3B  | -0.05 | -0.21 | 0.53  |
|                                                                               | 4B  | -0.05 | -0.21 | 0.56  |
|                                                                               | 5B  | -0.05 | -0.21 | 0.56  |
|                                                                               | 6H  | -0.07 | 0.03  | -0.65 |
|                                                                               | 7H  | -0.07 | 0.05  | -0.64 |
|                                                                               | 8H  | -0.07 | 0.05  | -0.64 |
|                                                                               | 9H  | -0.07 | 0.05  | -0.64 |
|                                                                               | 10B | 0.04  | 0.29  | 1.16  |

|                                                                              |     |       |       |       |
|------------------------------------------------------------------------------|-----|-------|-------|-------|
|                                                                              | 11C | -0.11 | -0.82 | -2.19 |
|                                                                              | 12B | 0.00  | 0.04  | 1.06  |
|                                                                              | 13B | 0.00  | 0.04  | 1.07  |
|                                                                              | 14B | 0.00  | 0.04  | 1.06  |
|                                                                              | 15H | -0.07 | 0.04  | -0.64 |
|                                                                              | 16H | -0.07 | 0.04  | -0.64 |
|                                                                              | 17H | -0.07 | 0.04  | -0.64 |
|                                                                              | 18H | 0.06  | 0.30  | 0.01  |
|                                                                              | 19H | -0.07 | 0.05  | -0.64 |
|                                                                              | 20C | -0.16 | -0.94 | -0.57 |
|                                                                              | 21H | 0.02  | 0.24  | -0.04 |
|                                                                              | 22H | 0.02  | 0.23  | -0.05 |
|                                                                              | 23H | 0.02  | 0.24  | -0.03 |
| [ <i>meta</i> -CB <sub>9</sub> H <sub>9</sub> CH <sub>3</sub> ] <sup>−</sup> |     |       |       |       |
|                                                                              | 1B  | -0.08 | -0.18 | 0.43  |
|                                                                              | 2B  | 0.00  | 0.03  | 0.66  |
|                                                                              | 3B  | -0.05 | -0.20 | 0.55  |
|                                                                              | 4B  | -0.05 | -0.21 | 0.56  |
|                                                                              | 5B  | -0.05 | -0.20 | 0.56  |
|                                                                              | 6H  | -0.07 | 0.04  | -0.64 |
|                                                                              | 7H  | -0.07 | 0.05  | -0.64 |
|                                                                              | 8H  | -0.07 | 0.05  | -0.64 |
|                                                                              | 9H  | -0.07 | 0.05  | -0.63 |
|                                                                              | 10B | 0.00  | 0.03  | 1.04  |
|                                                                              | 11C | -0.11 | -0.80 | -2.19 |
|                                                                              | 12B | 0.00  | 0.04  | 1.04  |
|                                                                              | 13B | 0.00  | 0.04  | 1.06  |
|                                                                              | 14B | 0.00  | 0.04  | 1.07  |
|                                                                              | 15H | -0.07 | 0.04  | -0.64 |
|                                                                              | 16H | -0.07 | 0.03  | -0.64 |
|                                                                              | 17H | -0.07 | 0.03  | -0.64 |
|                                                                              | 18H | 0.06  | 0.30  | 0.02  |
|                                                                              | 19H | -0.07 | 0.04  | -0.64 |
|                                                                              | 20C | -0.16 | -0.92 | -0.55 |
|                                                                              | 21H | 0.02  | 0.24  | -0.04 |

|                                                                                 |     |       |       |       |
|---------------------------------------------------------------------------------|-----|-------|-------|-------|
|                                                                                 | 22H | 0.01  | 0.23  | -0.05 |
|                                                                                 | 23H | 0.02  | 0.24  | -0.04 |
| [ <i>para</i> -CB <sub>9</sub> H <sub>9</sub> CH <sub>3</sub> ] <sup>-</sup>    |     |       |       |       |
|                                                                                 | 1B  | -0.03 | 0.08  | 0.58  |
|                                                                                 | 2B  | -0.06 | -0.21 | 0.54  |
|                                                                                 | 3B  | -0.05 | -0.21 | 0.53  |
|                                                                                 | 4B  | -0.05 | -0.21 | 0.53  |
|                                                                                 | 5B  | -0.05 | -0.21 | 0.53  |
|                                                                                 | 6H  | -0.07 | 0.05  | -0.64 |
|                                                                                 | 7H  | -0.07 | 0.05  | -0.64 |
|                                                                                 | 8H  | -0.07 | 0.05  | -0.64 |
|                                                                                 | 9B  | 0.00  | 0.04  | 1.07  |
|                                                                                 | 10C | -0.11 | -0.81 | -2.18 |
|                                                                                 | 11B | 0.00  | 0.04  | 1.07  |
|                                                                                 | 12B | 0.00  | 0.04  | 1.07  |
|                                                                                 | 13B | 0.00  | 0.04  | 1.06  |
|                                                                                 | 14H | -0.07 | 0.04  | -0.64 |
|                                                                                 | 15H | -0.07 | 0.04  | -0.64 |
|                                                                                 | 16H | -0.07 | 0.04  | -0.64 |
|                                                                                 | 17H | 0.06  | 0.30  | 0.02  |
|                                                                                 | 18H | -0.07 | 0.04  | -0.64 |
|                                                                                 | 19H | -0.07 | 0.05  | -0.64 |
|                                                                                 | 20C | -0.16 | -0.92 | -0.56 |
|                                                                                 | 21H | 0.01  | 0.23  | -0.05 |
|                                                                                 | 22H | 0.01  | 0.23  | -0.04 |
|                                                                                 | 23H | 0.01  | 0.23  | -0.04 |
| [ <i>ortho</i> -CB <sub>11</sub> H <sub>11</sub> CH <sub>3</sub> ] <sup>-</sup> |     |       |       |       |
|                                                                                 | 1B  | -0.04 | -0.19 | 0.58  |
|                                                                                 | 2B  | -0.04 | -0.16 | 0.57  |
|                                                                                 | 3B  | -0.01 | -0.02 | 0.84  |
|                                                                                 | 4B  | -0.01 | -0.02 | 0.85  |
|                                                                                 | 5B  | -0.05 | -0.20 | 0.58  |
|                                                                                 | 6B  | -0.05 | -0.19 | 0.57  |
|                                                                                 | 7H  | -0.07 | 0.06  | -0.63 |
|                                                                                 | 8H  | -0.07 | 0.06  | -0.63 |

|                                                                                |     |       |       |       |
|--------------------------------------------------------------------------------|-----|-------|-------|-------|
|                                                                                | 9H  | -0.06 | 0.05  | -0.63 |
|                                                                                | 10H | -0.06 | 0.05  | -0.63 |
|                                                                                | 11H | -0.07 | 0.06  | -0.63 |
|                                                                                | 12H | -0.07 | 0.06  | -0.63 |
|                                                                                | 13B | -0.04 | -0.19 | 0.58  |
|                                                                                | 14B | -0.05 | -0.19 | 0.56  |
|                                                                                | 15C | -0.03 | -0.72 | -1.78 |
|                                                                                | 16B | 0.03  | 0.23  | 0.94  |
|                                                                                | 17B | -0.01 | -0.02 | 0.85  |
|                                                                                | 18B | -0.01 | -0.03 | 0.83  |
|                                                                                | 19H | -0.07 | 0.06  | -0.63 |
|                                                                                | 20H | -0.07 | 0.06  | -0.63 |
|                                                                                | 21H | 0.06  | 0.32  | 0.03  |
|                                                                                | 22H | -0.06 | 0.05  | -0.63 |
|                                                                                | 23H | -0.06 | 0.05  | -0.63 |
|                                                                                | 24C | -0.15 | -0.93 | -0.57 |
|                                                                                | 25H | 0.02  | 0.23  | -0.04 |
|                                                                                | 26H | 0.02  | 0.24  | -0.03 |
|                                                                                | 27H | 0.02  | 0.24  | -0.03 |
| [ <i>meta</i> -CB <sub>11</sub> H <sub>11</sub> CH <sub>3</sub> ] <sup>−</sup> |     |       |       |       |
|                                                                                | 1B  | -0.05 | -0.19 | 0.58  |
|                                                                                | 2B  | -0.01 | -0.02 | 0.84  |
|                                                                                | 3B  | -0.04 | -0.16 | 0.55  |
|                                                                                | 4B  | -0.04 | -0.19 | 0.59  |
|                                                                                | 5B  | -0.01 | -0.02 | 0.85  |
|                                                                                | 6B  | -0.05 | -0.19 | 0.56  |
|                                                                                | 7H  | -0.07 | 0.06  | -0.63 |
|                                                                                | 8H  | -0.06 | 0.05  | -0.63 |
|                                                                                | 9H  | -0.07 | 0.06  | -0.64 |
|                                                                                | 10H | -0.07 | 0.06  | -0.63 |
|                                                                                | 11H | -0.06 | 0.05  | -0.63 |
|                                                                                | 12H | -0.07 | 0.06  | -0.63 |
|                                                                                | 13C | -0.02 | -0.72 | -1.78 |
|                                                                                | 14B | -0.01 | -0.02 | 0.83  |
|                                                                                | 15B | -0.05 | -0.19 | 0.56  |

|                                                                                |     |       |       |       |
|--------------------------------------------------------------------------------|-----|-------|-------|-------|
|                                                                                | 16B | 0.00  | 0.05  | 0.69  |
|                                                                                | 17B | -0.01 | -0.02 | 0.85  |
|                                                                                | 18B | -0.01 | -0.02 | 0.83  |
|                                                                                | 19H | 0.06  | 0.32  | 0.04  |
|                                                                                | 20H | -0.06 | 0.05  | -0.63 |
|                                                                                | 21H | -0.07 | 0.06  | -0.63 |
|                                                                                | 22H | -0.06 | 0.05  | -0.63 |
|                                                                                | 23H | -0.06 | 0.05  | -0.63 |
|                                                                                | 24C | -0.15 | -0.92 | -0.55 |
|                                                                                | 25H | 0.01  | 0.23  | -0.04 |
|                                                                                | 26H | 0.02  | 0.23  | -0.04 |
|                                                                                | 27H | 0.02  | 0.24  | -0.04 |
| [ <i>para</i> -CB <sub>11</sub> H <sub>11</sub> CH <sub>3</sub> ] <sup>−</sup> |     |       |       |       |
|                                                                                | 1B  | -0.01 | -0.02 | 0.86  |
|                                                                                | 2B  | -0.01 | -0.02 | 0.84  |
|                                                                                | 3B  | -0.05 | -0.19 | 0.56  |
|                                                                                | 4B  | -0.01 | -0.01 | 0.85  |
|                                                                                | 5C  | -0.03 | -0.72 | -1.78 |
|                                                                                | 6B  | -0.05 | -0.19 | 0.56  |
|                                                                                | 7H  | -0.06 | 0.05  | -0.63 |
|                                                                                | 8H  | -0.06 | 0.05  | -0.63 |
|                                                                                | 9H  | -0.07 | 0.06  | -0.63 |
|                                                                                | 10H | -0.06 | 0.05  | -0.63 |
|                                                                                | 11H | 0.06  | 0.32  | 0.04  |
|                                                                                | 12H | -0.07 | 0.06  | -0.63 |
|                                                                                | 13B | -0.01 | -0.02 | 0.84  |
|                                                                                | 14B | -0.05 | -0.19 | 0.57  |
|                                                                                | 15B | -0.05 | -0.19 | 0.56  |
|                                                                                | 16B | 0.00  | 0.08  | 0.68  |
|                                                                                | 17B | -0.01 | -0.01 | 0.85  |
|                                                                                | 18B | -0.05 | -0.19 | 0.57  |
|                                                                                | 19H | -0.06 | 0.05  | -0.63 |
|                                                                                | 20H | -0.07 | 0.06  | -0.63 |
|                                                                                | 21H | -0.07 | 0.06  | -0.63 |
|                                                                                | 22H | -0.06 | 0.05  | -0.63 |

|  |     |       |       |       |
|--|-----|-------|-------|-------|
|  | 23H | -0.07 | 0.06  | -0.63 |
|  | 24C | -0.15 | -0.92 | -0.55 |
|  | 25H | 0.02  | 0.23  | -0.04 |
|  | 26H | 0.02  | 0.23  | -0.04 |
|  | 27H | 0.02  | 0.23  | -0.04 |

**Fig S1.** Correlation matrix of main B–C bond descriptors and mean boron atomic charges in *closo*-borate anions of the general form  $[\text{B}_n\text{H}_{n-1}\text{CH}_3]^{2-}$  ( $n = 6, 10, 12$ ) and monocarboranes  $[\text{CB}_n\text{H}_{n-1}\text{CH}_3]^-$  ( $n = 5, 9, 11$ ).

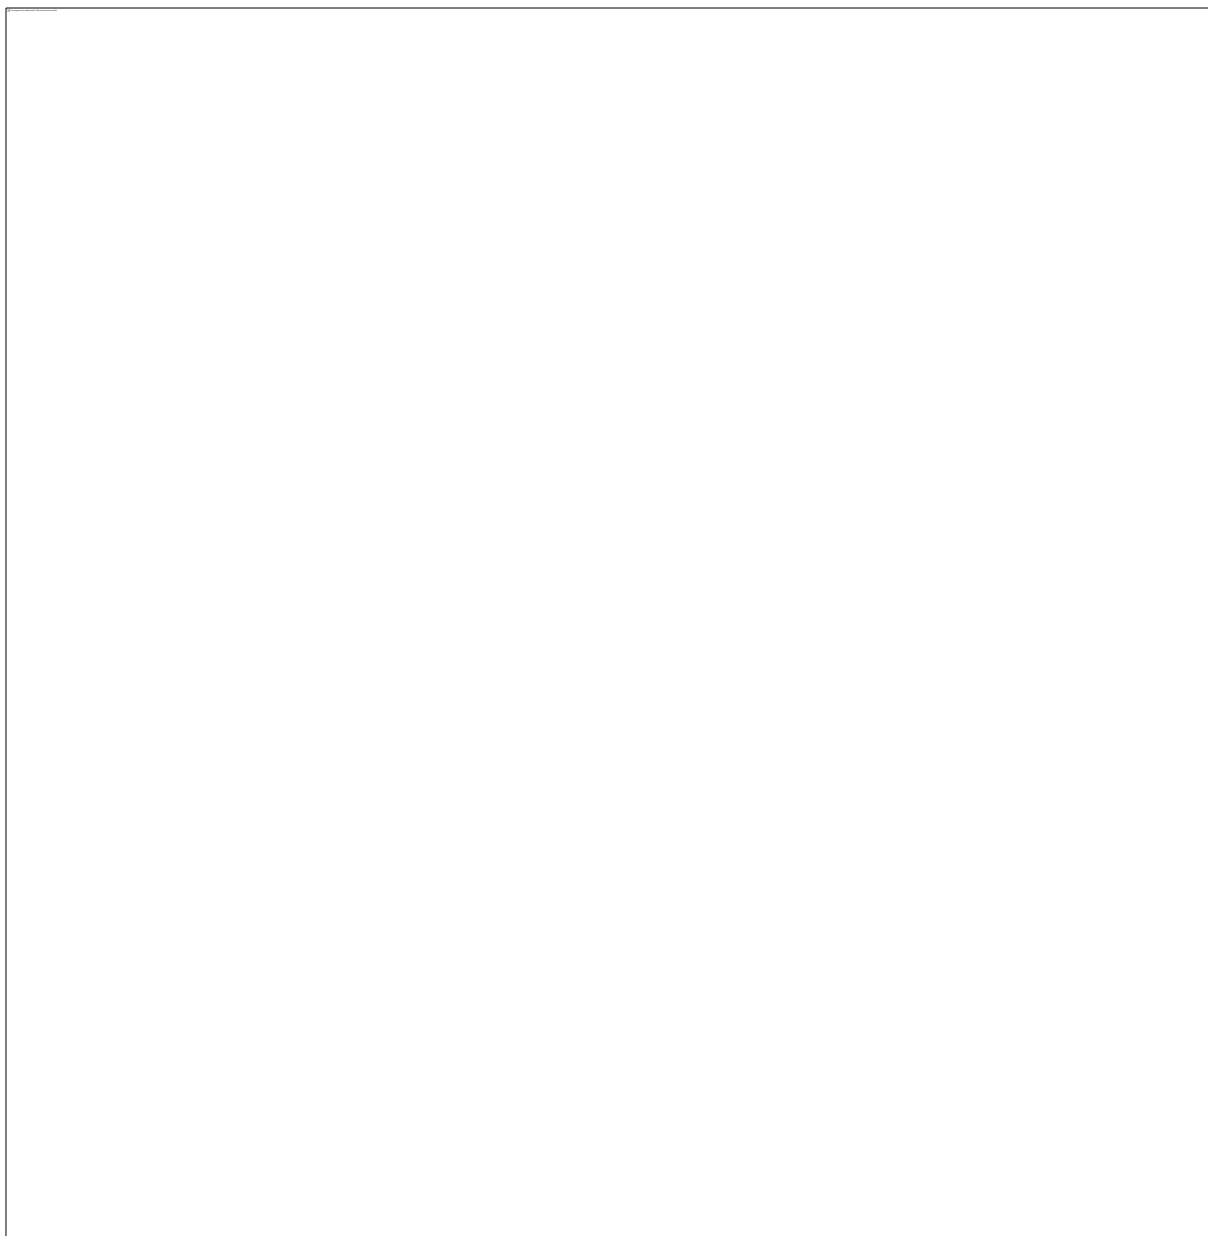

**Table S7.** Cartesian atomic coordinates of the calculated optimized equilibrium model structures. All coordinates are given in Angstrom units.

| Model species                      | Atom | x         | y         | z         |
|------------------------------------|------|-----------|-----------|-----------|
| (CH <sub>3</sub> )BH <sub>2</sub>  |      |           |           |           |
|                                    | B    | -5.704145 | 1.748821  | -0.013440 |
|                                    | C    | -6.720228 | 0.561017  | -0.036367 |
|                                    | H    | -7.139583 | 0.461197  | 0.976747  |
|                                    | H    | -6.206740 | -0.392115 | -0.215734 |
|                                    | H    | -7.550766 | 0.661624  | -0.739015 |
|                                    | H    | -4.706366 | 1.662871  | 0.650355  |
|                                    | H    | -5.890151 | 2.766665  | -0.622537 |
| (CH <sub>3</sub> ) <sub>2</sub> BH |      |           |           |           |
|                                    | B    | -5.814752 | 1.739815  | 0.298448  |
|                                    | C    | -6.672670 | 0.512097  | -0.169343 |
|                                    | H    | -7.403641 | 0.321360  | 0.633543  |
|                                    | H    | -6.107573 | -0.413942 | -0.315361 |
|                                    | H    | -7.272357 | 0.721164  | -1.061713 |
|                                    | H    | -6.300870 | 2.840920  | 0.215997  |
|                                    | C    | -4.357150 | 1.609120  | 0.864088  |
|                                    | H    | -4.133457 | 2.322550  | 1.664060  |
|                                    | H    | -4.077883 | 0.599189  | 1.180985  |
|                                    | H    | -3.684956 | 1.880329  | 0.033135  |
| (CH <sub>3</sub> ) <sub>3</sub> B  |      |           |           |           |
|                                    | B    | -5.826495 | 1.769766  | 0.303636  |
|                                    | C    | -6.680747 | 0.521978  | -0.149222 |
|                                    | H    | -7.083629 | 0.060514  | 0.766064  |
|                                    | H    | -6.073655 | -0.256828 | -0.625838 |
|                                    | H    | -7.535202 | 0.757038  | -0.792058 |

|                                                                   |   |           |           |           |
|-------------------------------------------------------------------|---|-----------|-----------|-----------|
|                                                                   | C | -4.383066 | 1.566928  | 0.910420  |
|                                                                   | H | -4.235641 | 2.163902  | 1.818558  |
|                                                                   | H | -4.111573 | 0.527479  | 1.120236  |
|                                                                   | H | -3.653599 | 1.959116  | 0.185579  |
|                                                                   | C | -6.421496 | 3.223289  | 0.135876  |
|                                                                   | H | -6.454288 | 3.457487  | -0.938782 |
|                                                                   | H | -7.465741 | 3.268990  | 0.470049  |
|                                                                   | H | -5.857385 | 4.019281  | 0.631497  |
| [B <sub>6</sub> H <sub>5</sub> CH <sub>3</sub> ] <sup>2-</sup>    |   |           |           |           |
|                                                                   | B | -0.683190 | 9.087749  | 4.779275  |
|                                                                   | B | -0.023884 | 10.036003 | 6.074066  |
|                                                                   | B | 0.589995  | 10.224086 | 4.460968  |
|                                                                   | H | -1.805994 | 8.881741  | 4.341807  |
|                                                                   | H | -0.485184 | 10.787435 | 6.921866  |
|                                                                   | H | 0.738532  | 11.166348 | 3.698493  |
|                                                                   | B | 1.567932  | 9.466013  | 5.679177  |
|                                                                   | B | 0.906272  | 8.519699  | 4.384001  |
|                                                                   | B | 0.295444  | 8.333003  | 5.999462  |
|                                                                   | H | 2.687545  | 9.650132  | 6.134472  |
|                                                                   | H | 1.364964  | 7.749505  | 3.551868  |
|                                                                   | C | 0.095531  | 7.076481  | 7.011804  |
|                                                                   | H | -0.946153 | 6.713957  | 7.022965  |
|                                                                   | H | 0.728607  | 6.216394  | 6.735274  |
|                                                                   | H | 0.352306  | 7.337848  | 8.052682  |
| [1-B <sub>10</sub> H <sub>9</sub> CH <sub>3</sub> ] <sup>2-</sup> |   |           |           |           |
|                                                                   | B | -0.273965 | 1.813916  | -0.518151 |
|                                                                   | B | -0.422452 | 0.537862  | -1.639481 |
|                                                                   | B | 1.133356  | 0.877935  | -0.736888 |



|                                                                   |   |           |           |           |
|-------------------------------------------------------------------|---|-----------|-----------|-----------|
|                                                                   | B | 0.210818  | 0.905589  | 0.841518  |
|                                                                   | B | -1.343665 | 0.566431  | -0.059411 |
|                                                                   | H | 2.161905  | 1.422550  | -1.080596 |
|                                                                   | H | 0.427912  | 1.482131  | 1.886968  |
|                                                                   | H | -2.498335 | 0.844685  | 0.192408  |
|                                                                   | B | 0.781123  | -0.792776 | -1.355198 |
|                                                                   | B | 0.296872  | -1.859723 | -0.118570 |
|                                                                   | B | -0.975277 | -1.013802 | -0.874678 |
|                                                                   | B | -0.526046 | -0.752622 | 0.885087  |
|                                                                   | B | 1.229514  | -0.532234 | 0.404475  |
|                                                                   | H | -1.885776 | -1.620832 | -1.397139 |
|                                                                   | H | -1.040146 | -1.129992 | 1.916609  |
|                                                                   | H | 2.262700  | -0.709239 | 1.013840  |
|                                                                   | H | 0.478299  | -3.047098 | 0.008945  |
|                                                                   | H | 1.418505  | -1.200850 | -2.302468 |
|                                                                   | H | -0.761870 | 0.783537  | -2.778698 |
|                                                                   | C | -0.519131 | 3.397005  | -0.689973 |
|                                                                   | H | -0.120611 | 3.770174  | -1.646044 |
|                                                                   | H | -1.590771 | 3.648507  | -0.666211 |
|                                                                   | H | -0.033526 | 3.975123  | 0.111405  |
| [2-B <sub>10</sub> H <sub>9</sub> CH <sub>3</sub> ] <sup>2-</sup> |   |           |           |           |
|                                                                   | B | 0.070969  | 1.929535  | 0.210223  |
|                                                                   | B | -0.294315 | 0.973255  | -1.154610 |
|                                                                   | B | 1.319431  | 0.883957  | -0.278730 |
|                                                                   | B | 0.448442  | 0.700920  | 1.324229  |
|                                                                   | B | -1.163317 | 0.784370  | 0.455398  |
|                                                                   | H | 0.056392  | 3.133192  | 0.323774  |
|                                                                   | H | 2.412755  | 1.324263  | -0.566119 |

|                                                                  |   |           |           |           |
|------------------------------------------------------------------|---|-----------|-----------|-----------|
|                                                                  | H | 0.771351  | 0.978060  | 2.460128  |
|                                                                  | H | -2.264679 | 1.143679  | 0.816726  |
|                                                                  | B | 0.704724  | -0.546867 | -1.208130 |
|                                                                  | B | 0.095360  | -1.779196 | -0.201355 |
|                                                                  | B | -1.048921 | -0.616764 | -0.691604 |
|                                                                  | B | -0.530782 | -0.809050 | 1.052926  |
|                                                                  | B | 1.229301  | -0.738590 | 0.533130  |
|                                                                  | H | -2.051502 | -0.948321 | -1.289651 |
|                                                                  | H | -1.071754 | -1.326089 | 2.007595  |
|                                                                  | H | 2.237892  | -1.194713 | 1.029136  |
|                                                                  | H | 0.103247  | -2.979909 | -0.334833 |
|                                                                  | H | 1.246250  | -0.818500 | -2.259533 |
|                                                                  | C | -0.737958 | 1.674634  | -2.548870 |
|                                                                  | H | 0.037589  | 2.370787  | -2.903376 |
|                                                                  | H | -0.924352 | 0.948898  | -3.354709 |
|                                                                  | H | -1.659438 | 2.261177  | -2.412306 |
| [B <sub>12</sub> H <sub>11</sub> CH <sub>3</sub> ] <sup>2-</sup> |   |           |           |           |
|                                                                  | B | 2.946179  | 6.333901  | 2.866168  |
|                                                                  | B | 1.362753  | 5.523982  | 3.014458  |
|                                                                  | B | 4.046730  | 5.608254  | 4.066152  |
|                                                                  | B | 3.278268  | 7.180644  | 4.401364  |
|                                                                  | B | 1.617022  | 7.128587  | 3.752350  |
|                                                                  | B | 2.865611  | 4.586489  | 3.211577  |
|                                                                  | H | 3.345853  | 6.754781  | 1.805354  |
|                                                                  | H | 0.636231  | 5.370307  | 2.060335  |
|                                                                  | H | 5.235691  | 5.496603  | 3.869593  |
|                                                                  | H | 3.915199  | 8.207281  | 4.438543  |
|                                                                  | H | 1.070719  | 8.118595  | 3.324934  |

|                                                                               |   |           |           |          |
|-------------------------------------------------------------------------------|---|-----------|-----------|----------|
|                                                                               | H | 3.214070  | 3.754243  | 2.405891 |
|                                                                               | B | 0.715101  | 5.871168  | 4.640281 |
|                                                                               | B | 1.489670  | 4.300281  | 4.305392 |
|                                                                               | B | 3.401878  | 5.951944  | 5.689257 |
|                                                                               | B | 3.154080  | 4.340220  | 4.957861 |
|                                                                               | B | 1.899975  | 6.893895  | 5.497383 |
|                                                                               | B | 1.820485  | 5.145767  | 5.836013 |
|                                                                               | H | -0.473103 | 5.967250  | 4.842949 |
|                                                                               | H | 0.862844  | 3.265942  | 4.273004 |
|                                                                               | H | 4.131471  | 6.093086  | 6.644273 |
|                                                                               | H | 1.556511  | 7.717279  | 6.312720 |
|                                                                               | H | 1.431881  | 4.712851  | 6.897285 |
|                                                                               | C | 3.886041  | 3.013393  | 5.531276 |
|                                                                               | H | 3.615351  | 2.828161  | 6.580847 |
|                                                                               | H | 3.606438  | 2.119173  | 4.955545 |
|                                                                               | H | 4.981086  | 3.107017  | 5.483562 |
| [ <i>ortho</i> -CB <sub>5</sub> H <sub>5</sub> CH <sub>3</sub> ] <sup>-</sup> |   |           |           |          |
|                                                                               | B | -0.710688 | 9.138762  | 4.791212 |
|                                                                               | B | 0.109613  | 9.969960  | 6.047885 |
|                                                                               | C | 0.685379  | 9.934939  | 4.523685 |
|                                                                               | H | -1.784402 | 9.252682  | 4.270333 |
|                                                                               | H | -0.148909 | 10.900239 | 6.760596 |
|                                                                               | H | 0.938595  | 10.727906 | 3.828485 |
|                                                                               | B | 1.572055  | 9.150635  | 5.642535 |
|                                                                               | B | 0.738126  | 8.312283  | 4.388022 |
|                                                                               | B | 0.141422  | 8.247522  | 6.003470 |
|                                                                               | H | 1.092470  | 7.619781  | 3.474390 |
|                                                                               | H | -0.137068 | 7.369350  | 6.776584 |

|                                                                               |   |           |           |           |
|-------------------------------------------------------------------------------|---|-----------|-----------|-----------|
|                                                                               | C | 3.103911  | 9.296523  | 6.074843  |
|                                                                               | H | 3.337059  | 8.646102  | 6.927513  |
|                                                                               | H | 3.791564  | 9.022925  | 5.263434  |
|                                                                               | H | 3.349483  | 10.323091 | 6.379239  |
| [ <i>meta</i> -CB <sub>5</sub> H <sub>5</sub> CH <sub>3</sub> ] <sup>-</sup>  |   |           |           |           |
|                                                                               | B | -0.674545 | 9.072114  | 4.799513  |
|                                                                               | B | -0.020288 | 10.010137 | 6.080307  |
|                                                                               | C | 0.569580  | 10.094606 | 4.564866  |
|                                                                               | H | -1.747074 | 9.006887  | 4.266401  |
|                                                                               | H | -0.448970 | 10.869513 | 6.799889  |
|                                                                               | H | 0.699687  | 10.929402 | 3.886788  |
|                                                                               | B | 1.554131  | 9.447328  | 5.688831  |
|                                                                               | B | 0.899448  | 8.509016  | 4.406855  |
|                                                                               | B | 0.292126  | 8.308704  | 6.016149  |
|                                                                               | H | 2.662998  | 9.758231  | 6.024188  |
|                                                                               | H | 1.368007  | 7.894449  | 3.489087  |
|                                                                               | C | 0.094780  | 7.072401  | 7.015551  |
|                                                                               | H | -0.943573 | 6.715367  | 7.020726  |
|                                                                               | H | 0.727590  | 6.218675  | 6.738803  |
|                                                                               | H | 0.348826  | 7.339565  | 8.050226  |
| [ <i>ortho</i> -CB <sub>9</sub> H <sub>9</sub> CH <sub>3</sub> ] <sup>-</sup> |   |           |           |           |
|                                                                               | B | 0.039156  | 1.946161  | 0.248048  |
|                                                                               | B | -0.294381 | 0.987072  | -1.117755 |
|                                                                               | B | 1.315203  | 0.931874  | -0.238686 |
|                                                                               | B | 0.438099  | 0.716739  | 1.358152  |
|                                                                               | B | -1.175228 | 0.771784  | 0.476697  |
|                                                                               | H | 0.004116  | 3.132740  | 0.388124  |
|                                                                               | H | 2.390444  | 1.389430  | -0.516079 |

|                                                                              |   |           |           |           |
|------------------------------------------------------------------------------|---|-----------|-----------|-----------|
|                                                                              | H | 0.742167  | 0.995489  | 2.485667  |
|                                                                              | H | -2.272620 | 1.099604  | 0.836656  |
|                                                                              | B | 0.748390  | -0.493277 | -1.203151 |
|                                                                              | C | 0.147173  | -1.569510 | -0.174557 |
|                                                                              | B | -1.023246 | -0.600971 | -0.683949 |
|                                                                              | B | -0.505133 | -0.798030 | 1.068870  |
|                                                                              | B | 1.257504  | -0.679749 | 0.563035  |
|                                                                              | H | -1.954776 | -1.072515 | -1.269146 |
|                                                                              | H | -1.008547 | -1.430431 | 1.950742  |
|                                                                              | H | 2.225887  | -1.217283 | 1.017456  |
|                                                                              | H | 0.180555  | -2.642478 | -0.303825 |
|                                                                              | H | -0.617708 | 1.496443  | -2.156447 |
|                                                                              | C | 1.471627  | -0.974176 | -2.543532 |
|                                                                              | H | 2.357959  | -1.580842 | -2.316425 |
|                                                                              | H | 0.800761  | -1.587159 | -3.160104 |
|                                                                              | H | 1.799484  | -0.126552 | -3.154583 |
| [ <i>meta</i> -CB <sub>9</sub> H <sub>9</sub> CH <sub>3</sub> ] <sup>-</sup> |   |           |           |           |
|                                                                              | B | 0.071433  | 1.915873  | 0.207456  |
|                                                                              | B | -0.296791 | 0.969672  | -1.165115 |
|                                                                              | B | 1.321503  | 0.876687  | -0.281686 |
|                                                                              | B | 0.449539  | 0.692818  | 1.324504  |
|                                                                              | B | -1.165509 | 0.778028  | 0.454156  |
|                                                                              | H | 0.058904  | 3.106578  | 0.322924  |
|                                                                              | H | 2.405310  | 1.310172  | -0.563530 |
|                                                                              | H | 0.769203  | 0.967102  | 2.448566  |
|                                                                              | H | -2.255083 | 1.131469  | 0.815657  |
|                                                                              | B | 0.705998  | -0.540277 | -1.211680 |
|                                                                              | C | 0.093513  | -1.603671 | -0.180691 |

|                                                                              |   |           |           |           |
|------------------------------------------------------------------------------|---|-----------|-----------|-----------|
|                                                                              | B | -1.052637 | -0.608766 | -0.694709 |
|                                                                              | B | -0.533217 | -0.800767 | 1.057527  |
|                                                                              | B | 1.233150  | -0.731264 | 0.535649  |
|                                                                              | H | -1.999778 | -1.054684 | -1.274806 |
|                                                                              | H | -1.045019 | -1.414245 | 1.947901  |
|                                                                              | H | 2.188762  | -1.287439 | 0.992470  |
|                                                                              | H | 0.100562  | -2.677250 | -0.299144 |
|                                                                              | H | 1.218711  | -0.928463 | -2.220936 |
|                                                                              | C | -0.737313 | 1.670199  | -2.546912 |
|                                                                              | H | 0.032125  | 2.372481  | -2.891681 |
|                                                                              | H | -0.918064 | 0.954340  | -3.358522 |
|                                                                              | H | -1.658617 | 2.250134  | -2.407961 |
| [ <i>para</i> -CB <sub>9</sub> H <sub>9</sub> CH <sub>3</sub> ] <sup>−</sup> |   |           |           |           |
|                                                                              | B | -0.275199 | 1.810931  | -0.518799 |
|                                                                              | B | -0.422384 | 0.532624  | -1.641726 |
|                                                                              | B | 1.135163  | 0.874277  | -0.737399 |
|                                                                              | B | 0.211153  | 0.902428  | 0.842879  |
|                                                                              | B | -1.346163 | 0.562036  | -0.059232 |
|                                                                              | H | 2.154994  | 1.409729  | -1.076858 |
|                                                                              | H | 0.427907  | 1.467154  | 1.880102  |
|                                                                              | H | -2.490357 | 0.828770  | 0.191120  |
|                                                                              | B | 0.781569  | -0.780824 | -1.360355 |
|                                                                              | C | 0.269533  | -1.683299 | -0.137303 |
|                                                                              | B | -0.980223 | -1.003306 | -0.877608 |
|                                                                              | B | -0.529468 | -0.741150 | 0.886414  |
|                                                                              | B | 1.230276  | -0.519332 | 0.404967  |
|                                                                              | H | -1.824305 | -1.701359 | -1.358256 |
|                                                                              | H | -0.998295 | -1.220837 | 1.876876  |

|                                                                                 |   |           |           |           |
|---------------------------------------------------------------------------------|---|-----------|-----------|-----------|
|                                                                                 | H | 2.228703  | -0.809354 | 0.995923  |
|                                                                                 | H | 0.433133  | -2.744521 | -0.021742 |
|                                                                                 | H | 1.405143  | -1.291562 | -2.243959 |
|                                                                                 | H | -0.758044 | 0.769898  | -2.770357 |
|                                                                                 | C | -0.515328 | 3.379226  | -0.687445 |
|                                                                                 | H | -0.117703 | 3.747466  | -1.641505 |
|                                                                                 | H | -1.583709 | 3.627903  | -0.660830 |
| [ <i>ortho</i> -CB <sub>11</sub> H <sub>11</sub> CH <sub>3</sub> ] <sup>−</sup> |   |           |           |           |
|                                                                                 | B | 2.896691  | 6.409654  | 2.815356  |
|                                                                                 | B | 1.228199  | 5.787932  | 2.892398  |
|                                                                                 | B | 3.887019  | 5.408304  | 3.891270  |
|                                                                                 | B | 3.321970  | 7.001508  | 4.432792  |
|                                                                                 | B | 1.676759  | 7.243775  | 3.818593  |
|                                                                                 | B | 2.600848  | 4.653905  | 2.937405  |
|                                                                                 | H | 3.366539  | 6.911287  | 1.834724  |
|                                                                                 | H | 0.491284  | 5.847403  | 1.949356  |
|                                                                                 | H | 5.060469  | 5.193438  | 3.807352  |
|                                                                                 | H | 4.121042  | 7.847019  | 4.703287  |
|                                                                                 | H | 1.277419  | 8.340325  | 3.552451  |
|                                                                                 | H | 2.863996  | 3.895298  | 2.048374  |
|                                                                                 | B | 0.626558  | 6.002465  | 4.556390  |
|                                                                                 | B | 1.199555  | 4.403473  | 4.011546  |
|                                                                                 | C | 3.203251  | 5.628132  | 5.430365  |
|                                                                                 | B | 2.851680  | 4.156441  | 4.627664  |
|                                                                                 | B | 1.925981  | 6.750130  | 5.503388  |
|                                                                                 | B | 1.635367  | 5.003145  | 5.618781  |
|                                                                                 | H | -0.522856 | 6.215499  | 4.816450  |
|                                                                                 | H | 0.465009  | 3.464517  | 3.887768  |

|                                                                                |   |           |          |          |
|--------------------------------------------------------------------------------|---|-----------|----------|----------|
|                                                                                | H | 3.868420  | 5.571140 | 6.285020 |
|                                                                                | H | 1.805709  | 7.431801 | 6.476811 |
|                                                                                | H | 1.329681  | 4.523966 | 6.670656 |
|                                                                                | C | 3.483976  | 2.776170 | 5.134674 |
|                                                                                | H | 4.023935  | 2.898260 | 6.082414 |
|                                                                                | H | 2.704086  | 2.023757 | 5.298415 |
|                                                                                | H | 4.191600  | 2.368525 | 4.403583 |
| [ <i>meta</i> -CB <sub>11</sub> H <sub>11</sub> CH <sub>3</sub> ] <sup>−</sup> |   |           |          |          |
|                                                                                | B | 2.954994  | 6.334956 | 2.862410 |
|                                                                                | B | 1.385216  | 5.522725 | 3.016266 |
|                                                                                | B | 4.051517  | 5.609398 | 4.063796 |
|                                                                                | B | 3.287156  | 7.182307 | 4.399174 |
|                                                                                | B | 1.636087  | 7.120579 | 3.751979 |
|                                                                                | B | 2.876446  | 4.585974 | 3.207625 |
|                                                                                | H | 3.319235  | 6.760378 | 1.804093 |
|                                                                                | H | 0.556735  | 5.394815 | 2.165195 |
|                                                                                | H | 5.229965  | 5.505378 | 3.867858 |
|                                                                                | H | 3.888463  | 8.216411 | 4.442358 |
|                                                                                | H | 0.971463  | 8.043675 | 3.388531 |
|                                                                                | H | 3.191325  | 3.756711 | 2.402666 |
|                                                                                | C | 0.887407  | 5.855017 | 4.612104 |
|                                                                                | B | 1.512966  | 4.303794 | 4.302467 |
|                                                                                | B | 3.413195  | 5.952517 | 5.687575 |
|                                                                                | B | 3.170233  | 4.333737 | 4.957258 |
|                                                                                | B | 1.920432  | 6.887661 | 5.489777 |
|                                                                                | B | 1.843035  | 5.145423 | 5.827520 |
|                                                                                | H | -0.177256 | 5.938486 | 4.795820 |
|                                                                                | H | 0.772795  | 3.364986 | 4.298997 |



|                                                                                |   |           |          |          |
|--------------------------------------------------------------------------------|---|-----------|----------|----------|
|                                                                                | H | 4.109383  | 6.101601 | 6.651394 |
|                                                                                | H | 1.445269  | 7.657573 | 6.268927 |
|                                                                                | H | 1.322649  | 4.761768 | 6.832781 |
|                                                                                | C | 3.876563  | 3.010612 | 5.534525 |
|                                                                                | H | 3.604356  | 2.829362 | 6.581602 |
|                                                                                | H | 3.595320  | 2.118387 | 4.961940 |
|                                                                                | H | 4.969087  | 3.096864 | 5.489727 |
| [ <i>para</i> -CB <sub>11</sub> H <sub>11</sub> CH <sub>3</sub> ] <sup>−</sup> |   |           |          |          |
|                                                                                | B | 2.951216  | 6.317054 | 2.877956 |
|                                                                                | B | 1.374743  | 5.510494 | 3.026158 |
|                                                                                | B | 4.052912  | 5.599165 | 4.068773 |
|                                                                                | B | 3.282827  | 7.160760 | 4.407103 |
|                                                                                | C | 1.695532  | 6.986588 | 3.813533 |
|                                                                                | B | 2.870625  | 4.576920 | 3.213953 |
|                                                                                | H | 3.246945  | 6.836872 | 1.844075 |
|                                                                                | H | 0.631364  | 5.498449 | 2.091085 |
|                                                                                | H | 5.230033  | 5.524231 | 3.857308 |
|                                                                                | H | 3.797294  | 8.237947 | 4.383873 |
|                                                                                | H | 1.206713  | 7.873776 | 3.429230 |
|                                                                                | H | 3.201800  | 3.774363 | 2.388753 |
|                                                                                | B | 0.729977  | 5.856936 | 4.645066 |
|                                                                                | B | 1.493632  | 4.291559 | 4.309322 |
|                                                                                | B | 3.407224  | 5.944967 | 5.693388 |
|                                                                                | B | 3.159696  | 4.330468 | 4.962346 |
|                                                                                | B | 1.909389  | 6.875673 | 5.499015 |
|                                                                                | B | 1.824562  | 5.137799 | 5.841364 |
|                                                                                | H | -0.437273 | 6.074603 | 4.776140 |
|                                                                                | H | 0.842720  | 3.286816 | 4.260938 |

|  |   |          |          |          |
|--|---|----------|----------|----------|
|  | H | 4.121066 | 6.122956 | 6.639141 |
|  | H | 1.521770 | 7.764644 | 6.195312 |
|  | H | 1.413976 | 4.738837 | 6.894040 |
|  | C | 3.885567 | 3.013556 | 5.530405 |
|  | H | 3.611543 | 2.824852 | 6.575594 |
|  | H | 3.610233 | 2.122825 | 4.952509 |
|  | H | 4.977950 | 3.107984 | 5.487988 |
